# Supplementary material for: Identification of a Novel Strong and Ubiquitous Promoter/Enhancer in the Silkworm Bombyx mori
Source: PubMed Central journal article supplement (PMC4455783; doi:10.1534/g3.114.011643), 2014-05-23
Supplement: supp_g3.114.011643_011643SI.pdf [file supp_g3.114.011643_011643SI.pdf]

**Identification of a novel strong and ubiquitous promoter/enhancer in the silkworm *Bombyx mori***

Takuya Tsubota<sup>\*1</sup>, Keiro Uchino<sup>\*1</sup>, Takao K Suzuki<sup>\*</sup>, Hiromitsu Tanaka<sup>§</sup>, Takumi Kayukawa<sup>†</sup>, Tetsuro Shinoda<sup>†</sup>, Hideki Sezutsu<sup>\*2</sup>

<sup>\*</sup>Transgenic Silkworm Research, <sup>§</sup>Insect Mimetics Research and <sup>†</sup>Insect Growth Regulation Research Unit, National Institute of Agrobiological Sciences, 1-2 Owasahi, Tsukuba, Ibaraki 305-8634, Japan

<sup>1</sup> These authors contributed equally to this work.

<sup>2</sup> Corresponding author.

Hideki Sezutsu  
Transgenic Silkworm Research Unit,  
National Institute of Agrobiological Sciences,  
1-2 Owasahi, Tsukuba, Ibaraki 305-8634, Japan  
Tel: +81-29-838-6091; fax: +81-29-838-6091  
E-mail: hsezutsu@affrc.go.jp

**DOI: 10.1534/g3.114.011643**

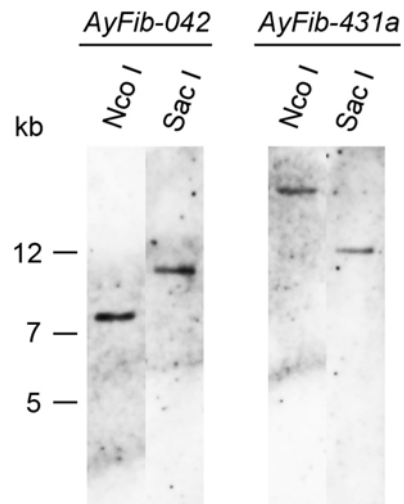

**Figure S1** Southern hybridization of *AyFib-042* and *AyFib-431a* genomic DNAs. A single band was detected in both strains. Note the difference in band positions in *AyFib-042* and *AyFib-431a*.

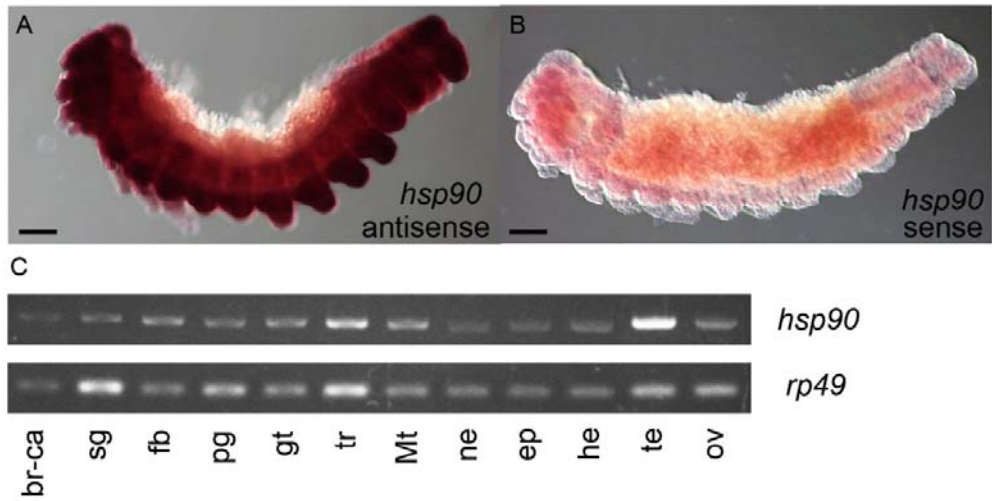

**Figure S2** Expression of *hsp90*. (A, B) *In situ* hybridization of *hsp90* in a stage 20 embryo. The embryo was stained with an *hsp90* antisense (A) or sense (B) probe. Bar represents 0.1 mm. (C) RT-PCR of *hsp90* (upper panel) or *rp49* (lower panel) in each tissue of a *w-c* spinning stage larva. Abbreviations are: br-ca, brain-corpora allata; sg, silk gland; fb, fat body; pg, prothoracic gland; gt, gut; tr, trachea; Mt, Malpighian tubule; ne, ventral nerves; ep, epidermis; he, hemocyte; te, testis; ov, ovary.

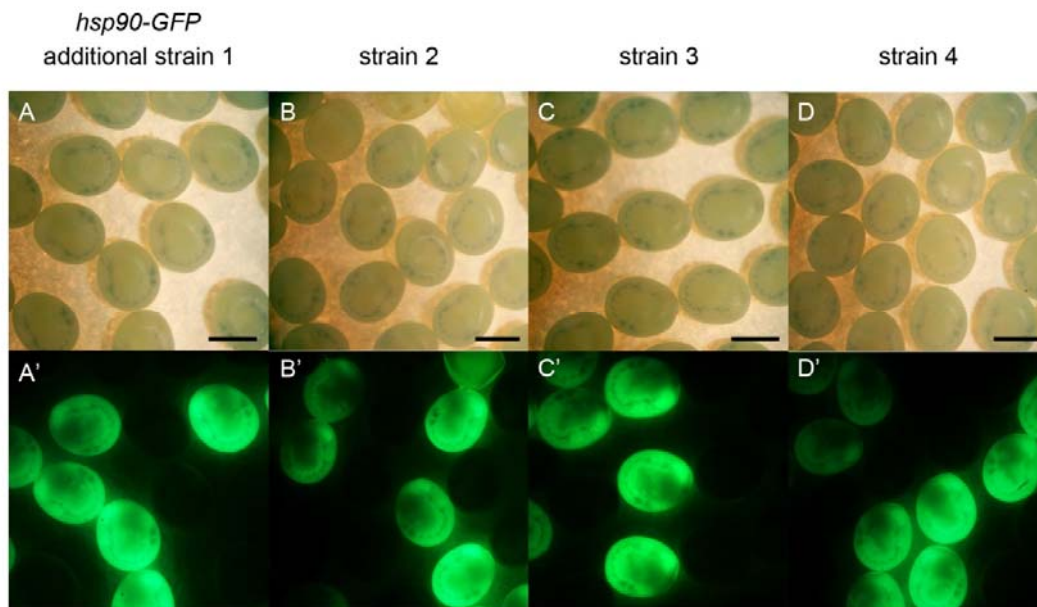

**Figure S3** Embryonic GFP expression in four additional *hsp90-GFP* transgenic strains. (A, A') Strain 1. (B, B') Strain 2. (C, C') Strain 3. (D, D') Strain 4. (A, B, C, D) Bright-field images. (A', B', C', D') GFP images. Bar represents 1 mm.

```

1 CCATGGCTCAGTTCGCTTTAAATATCGATAGTCTTTAAAAAATATGATGTGAAATCTGAAAAGGTTTGCACACTATGCGCTCATGC 90
91 AATTCAACTTTAATCAATAGCCCTAAAGCAGTGCGCCAACAAATAAAAAATATTTATGTAAGTGAATAACAAAATTTGTGAGAAT 180
181 TCATCGCTTCTTTGCTATTTTTTATTATGGTTTGTGTTTAAATATATTTTAAACGTGTTGATGAAATAGTAAGATAATTAGCATTAAAT 270
271 TACACCACCTTTCGTGAAGGTTTCTGGCTAATCGTTTCAGTTTGTGTGGCATAAAACTATGGGCTATAACTATTGCTGGTGAAGCTTTAA 360
361 CAGCTTCATAAGGACGGGTGGATTAACCAAAAACACAGCTTGGAGGAAAGAGTTGCTAATAGCCGCCAGAGTGCCTCCAAAAGGGGT 450
451 TTAATAGTACTAGGACAGTTACTTTACGAGTGCATCTACTCCGTGTCGAGAAGCTTAGAGCTCAGTATCACATACAAATCGTCGACGAGT 540
541 TAGTGAACCATGCTTTTATGCTCTTGGCGTTAAATTAGTAGTGATAATGAGAACGTATCAGGTGGATCTTGCATTATTTGAAAGATG 630
631 AGACTAAAGATCTGTAGGTTGTGCGAGAGAATGTCGCGAGGCAAAAATAGTTTCCTCTACCTGTAGATAACGAGAACACAAAATTTTATAC 720
721 AGGGTGTATAGGAGAAGACGAGGAACAATTATTTAATGATTTCTGACATCTAAATGAACAATAAGATTTTACTTTTGTGAAACAAAACA 810
811 AGTAACTCACATCTTAACTGAACGTTACTACGTTCTGGTTGTGATTTGTAATTTTAAATCAATGTTTTCTCCAATTCGATTATGATACA 900
901 AATAAAGCTCATATTCGCGTTTCTTCACTCGCGTTTCACTATTCGAGATTAAATGTGCCAATTCCTATTTTCGCAATTAAGA 990
991 TCTCTTTATTCGCGGATCTAATCGATACATAGACATGATAAAAAGAAATCCAATATTAAGTATTCAACTGAATATCCTTTATAATCGCG 1080
1081 CTATAATCACGGTTTATCTATAAAGCCTTGTTCGGACTAGGCGAGTATTTTAGTCGAGTACCGAGTAATTTAGTAGCTAAATGTGTCCGA 1170
1171 GCACAAAAGTTTAGTCGAGTAGGTTAGTAAATAATTTAGTAAAGCCAAATCCATTTTGTCTATTTTATCGGGCGAGTAGCGCTCCAC 1260
1261 CACGCGTCTAGCTCACTGGCTCACTGACTAAACAAGTCCGAACCTGTTGATTAGTCGAGTTCATTAGTGGCGCTTCTCAAATGGAACCT 1350
1351 TCGGACATCTTAACTATCGAAGTATTCTTTGGGATCTCTTCCAATGCTAATCTTTCAGAAGACATTTATCTCTCAATCGATCCATT 1440
1441 TTCGTACCTATAACTTATTTTTCTAATAACACAGAAATTTGCTCGTCCACCTTTTCTAAAATAGCCATTACGATTAGCTTAATCAGTTTAT 1530
1531 TCACCTATTTGCGTTGCGAGTCTGTTTCATCTGCAAAACACCACTCACTTGTGTACTCTACTGGACCGTAATGCGAAGCATTCTGTGCAG 1620
1621 TAGCGAGTAGTTTAGCCACTAAATTACTCGGTACTCGACTAAAATACTCGCCTAGTCCGAACAAGGCTTTAGCGACATATTACGTAACG 1710
1711 TATACACCCCGATAAAGAGATTTACTGTCCAAAAAAGCTCAAAAAATGGAACAAATTATGTGCTTTTTTATTTATTTGGTATTACTAATT 1800
1801 TCGTTAAGAATTCATCGGAAGCAGCCAGCGCGAATGCGGTGAATAGTAAACTATAAGAAGGAAGCGGTTGGAATGATCTGGGTAAAA 1890
1891 TGTTATTTCTTACGAATTACGATGATCTTTGATTAATTTGGAAGTTTGTGGTCAAATTAATTAACATTCATCTGTATCATTTAT 1980
1981 TGACTCTAATTTCAACTAAGTTATTTCTGTAATGTTAAATTTTCGATGCTTTTCTAGAATATTCAG GAATGTTCCAGATATTTCTGTGTG 2070
HSE-3 HSE-2
2071 TAGATCGTATTGCCACCTTGTGCCAAATAGCGGCATAAAAATAATTCGGCAGAGCTATACAACATTTGGTAAATTTTATTTTGTGCTAT 2160
2161 TTTCCCCAGTTTTTTAAATTAATCTGTTTTTAACTAGCAATTACATTTAATGGATGCAATTTACACTGCCTTAATAATTTTTTTTAGT 2250
2251 TGTAATTTGGTTTCTTACGTTTATGCTGTATATTTTAGTGATCTGCAAAATGCGAAACACTGAACAGCTTAGGAAAATTTAAATGTGA 2340
2341 GATGTTTCTTTTACTTAAATAAATACTTAAATAATAACAGAGAAAAACATTTTAACTAGTCTGGCATATTTTAGTGAACTATTGATG 2430
2431 AAAATGAACGAAATATGTAATTACCTTTATAATTTCTTGAATTTTAAAGAAATATATTTTCCCTAACACTTTAAACTTCAAAGCGGG 2520
2521 TGATGCAATAATAACTAACCAAAAAGAACTTGCAGTGTAAAGTAAATGATTTTCTCTCGTTTTATGGCTCCCAAAATGAAATTAAT 2610
2611 TGCCAAATTAATTTGAAATGATTAATTTTATTTTAAATATTTGTTTCGGTTTGTATTGATGGTAAAATGTTGATGCTCTGACGGAAT 2700
2701 AGCGTCAGAA TCGAGAACTTCTACTGATTCTAGATGTCGCTTGTAGAGGAAAGTATAAAAACGAAATTTACACACCGCGCCGgcgtt 2790
HSE-1
2791 atttgaactaagagaagtacggagactaacgtttgatactttgagcgtttgaaacacgtgtgttaaaaccctctagtcattttgtgtgaa 2880
2881 ttaa 2884

```

**Figure S4** Sequence of *Bombyx hsp90<sup>P2.9k</sup>* fragment. The boxed region shows three putative HSE elements. The transcribed region of *hsp90* is written in lower case. The *hsp90<sup>P2.0k</sup>* sequence is shown in the italic character. The underlined region shows the genomic fragment used for *hsp90-GAL4* transgenic strain in Uchino *et al.* (2006).
