# Supplementary material for: Identification of a Novel Strong and Ubiquitous Promoter/Enhancer in the Silkworm Bombyx mori
Source: PubMed Central journal article supplement (PMC4455783; doi:10.1534/g3.114.011643), 2014-05-23
Supplement: supp_g3.114.011643_FigureS1.pdf [file supp_g3.114.011643_FigureS1.pdf]

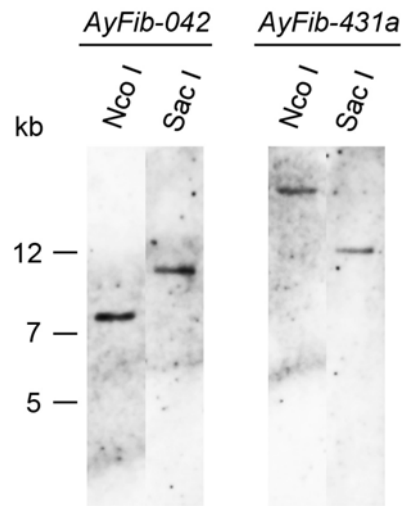

**Figure S1** Southern hybridization of *AyFib-042* and *AyFib-431a* genomic DNAs. A single band was detected in both strains. Note the difference in band positions in *AyFib-042* and *AyFib-431a*.
