# Supplementary material for: Identification of a Novel Strong and Ubiquitous Promoter/Enhancer in the Silkworm Bombyx mori
Source: PubMed Central journal article supplement (PMC4455783; doi:10.1534/g3.114.011643), 2014-05-23
Supplement: supp_g3.114.011643_FigureS4.pdf [file supp_g3.114.011643_FigureS4.pdf]

1 CCATGGCTCAGTTCGCTTTAAATATCGATAGTCTTTAAAAAAAATTATGATGTGAAATCTGAAAAGGTTTGC GCACTATGCGCTCATGC 90

91 AATTTCAACTTTAATCAATAGCCCTAAAGCAGTGTGCCAACAAAATAAAAAATATTTATTTGTAAGTGAGATAACTAAATTTGTGAGAAT 180

181 TCATCGCTTCTTTGCTATTTTTTATTATGGTTTGTGTTAATTATATTTTAAACGTGTTGATGAAATAGTAAGATAATTAGCATTAAAT 270

271 TACACCACTTTCGTGAAGGTTTTCTGGCTAATCGTTTCAGTTTGTGTGGCATAAAACTATGGGCTATAACTATTGCTGGTGAGACTTTAA 360

361 CAGCTTCATAAGGACGGGTGGATTAACCAAAACACAGCTTGGAGGGAAAGAGTTTGCATAAGCCGCCAGAGTGCCTCCAAAAGGGGT 450

451 TTAATAGTACTAGGACAGTTACTTTACGAGTGCATCTACTCCGTGTCGAGAAGCTTAGAGCTCAGTATCACATACAAATCGTCGACGAGT 540

541 TAGCTGAACCATGCTTTTATTGCTCTTGGCGTTAAAATTAGTAGTGATAATGAGAACGTATCAGTGGATCTTGCAATTATTTGAAAGATG 630

631 AGACTAAAGATCTGTAGGTTGTGCGAGAGAATGTCGCGAGGCAAAAATAGTTTCTCTACCTGTAGATAACGAGAACACAAATTTTATAC 720

721 AGGGTGTATAGGAGAAGACGAGGAACAATTATTTTAAATGATTTCTGACATCTAAATGAACAATAAGATTTTACTTTTGATGAACAAAACA 810

811 AGTAACTCACATCTTAACTGAACGTACTACGTTCTGGTTTGTCTATTGTAATTTTAAATCAATGTTTTCTCCAATCTGCATTATGATACA 900

901 ATAAAAGCTCATTATTCGCGTTTCTTCACTCGCGTTTCACTATTCGCAGATTAAAATGTGTCCCAATTCTATTTTCGCAATTAAAGA 990

991 TCTCTTTATTCGCGGATCTAATCGATACATAGACATTGATAAAAAAGAAATCCAAATTTAAGTATTCAACTGAATATCCTTTATAATCGCG 1080

1081 CTATAATCAGCGTTTATCTATAAAGCCTTGTTCGGACTAGGCGAGTATTTTAGTCGAGTACCGAGTAATTTAGTAGCTAAATGTGTCCGA 1170

1171 GCACCAAAAGTTTAGTCGAGTAGGTTAGTAAATAATTTAGTAAAGCCAAATCCATTTTGTCTATTTTATCGGGCGAGTAGCGCTCCAC 1260

1261 CACGCGTCTAGCTCACTGGCTCACTGACTAAACAAGTCCGAACCTGTTGATTAGTCGAGTTCATTAGTGGCGTCTCTCAAATGGAACCT 1350

1351 TCGGACATTCTTAACTATCGAAGTATCTTTGGGATCTTCCAATGCTAATCTTTTCAAGACATTTATCTCTCAATCGATCCATT 1440

1441 TTCGTACCTATAACTTATTTTTCATAATCACAGAAAATTGCTCGTCCACCTTTTCTAAAATAGCCATTACGATTAGCTTAAATCAGTTTAT 1530

1531 TCACTCTATTGCGTTGCAGTCTGTTTCATCCTGCAAAAACCCACTCACTTGTGTACTCTACTGGACCGTAATGCGAACGATTTCTGTGCAG 1620

1621 TAGCGAGTAGTTTAGCCACTAAATTAAGTACTCGGTACTCGACTAAAATACTCGCCTAGTCCGAACAAGGCTTTAGCGACATATTTACGTAACG 1710

1711 TATACACCCCGATAAAGAGATTTACTGTCCAAAAAAAACGTCAAAAAATGGAACAAATATGTGCTTTTTATTTATTGTTACTACTAATT 1800

1801 TCGTTAAGAAATTCATCGGAAGCAGCCAGCGCCGAATGCGGTGAATAGTAAAACATAAGAAGGAAAGCGGTTGGAATGATCTGGGTAAAA 1890

1891 TGTTATTTCTTACGAATTACGATGATCTTTGATTAAATTTGGAAAAGTTTTGTGGTCAAATTTTAAACATTCATCTGTATCATTAT 1980

1981 TGACTCTAATTTCAACTAAGTATTTCTGTAATGTTAAAATTTTCGATGCTTTTCTAGAAATATTCAGGAATGTTCCAGATATTCTGTGTG 2070

2071 TAGATCGTATTGCCACCTGTGCCAAATAGCGGCACTAAAATAATTCGGCAGAGCTATACAACATTTGGTAATTTTATTTATTTTGTCTAT 2160

2161 TTTCCCAGTTTTTTAAATTAAGTGTGTTTTTAACTAGCAATTACATTTAATTGGATGCAATTTACTGCCTTAATAATTTTTTTTTAGT 2250

2251 TGTAATTTGGTTTCTTACGTTTATGCTGTATATTTTAGTGATCTGCAAAATGCGAAACACTGAACAGCTTAGGAAAATTTAAAATGTGA 2340

2341 GATGTTTCTTTTACTTAAATAAATACTTAAAATAAACAAGAGAAAACATTTTAACTAGTCTGGCATATTTTAGTGAATCTATTGATG 2430

2431 AAAATGAACGAAATATGTAATTACCTTTATAATTTCTGAAATATTTTAAAGGAAATATATTTTCCCTAACACTTTAACTTCAAAGCGGG 2520

2521 TGATGCAATAATAACTAACACAAAAGAAACTTGCAGTGTAAAGTAAATGATTTTCTCTCGTTTTATGGCCTCCAAAATGAAAATAAT 2610

2611 TGCCAATTAATTTGAAATGATTAATATTTTATTTAATATTGTTTCGGTTTGTATTGATGGTAAAATGTTGATGCTCTCTGACGGAAT 2700

2701 AGCGTCAGAAATCGAGAACTTCTACTGATTCATAGATGTCGCTTGCTAGAGGAAAGTATAAAAACGAATTTACACACCGCGCCGgcggtt 2790

2791 atttgaactaagagaagtacggagactaacggttgatactttgcgctttgaaacacgtgtgttaaaaacctctagtcattttgtgtgaa 2880

2881 ttaa 2884

**Figure S4** Sequence of *Bombyx* hsp90<sup>P2.9k</sup> fragment. The boxed region shows three putative HSE elements. The transcribed region of *hsp90* is written in lower case. The hsp90<sup>P2.0k</sup> sequence is shown in the italic character. The underlined region shows the genomic fragment used for *hsp90-GAL4* transgenic strain in Uchino *et al.* (2006).
